# Supplementary material for: Ocean wave spectra bias correction through energy conservation for climate change impacts
Source: Copernicus journal article supplement (doi:10.5194/egusphere-2024-2947), 2024-10-09
Supplement: Supplementary file [file egusphere-2024-2947-RC1-supplement.pdf]

### General Comment:

This is a comprehensive study that deals with wave spectra bias correction methods and its applications for the future wave climate in a Mediterranean Sea. The study is well written, the novel methods looks appropriate and results are of high scientific value (although all figures need a revision). What I particularly liked in this study that new methods were developed and results are promising. However, I missed a broader discussion and comparison with the previous studies and differences in the results. I believe that this could add more value for this paper.

Also, for me was not clear why only the RCP8.5 was chosen for the future climate impacts. This is the most pessimistic scenario, therefore I would suggest to include at least one more scenario or prove, why only this was chosen.

The authors wanted to be short and presented only part of their results, however I think that all seasons bias correction results could be described in a paper and not moved to supplements.

### Specific comments:

The weakest part of this paper is figures. Due to their complexity it is very hard to read. In a comment reply, I've found already updated figures. However, they all still need revision. At some figures text is hidden by circles or it is not readable due to the complex shoreline that disturbs a lot. Also, the legends should be homogenized, otherwise it sometimes misleads.

Figures in supplements should be revised, too. The legends are terrible, a lot of text on a figure makes it unreadable.

Abstract. Line 8

The end-of-century period is wrong, please correct it. 2064 or 2074?

Lines 40-44

Is this a study of Lira-Loarca, Besio of 2022 or 2023?

Lines: 168, 183, 212, 236

Typing errors
